## PERSPECTIVAS

### EDITORIALES

- 929 **¿Es el TDAH con comienzo en la edad adulta una entidad independiente?**  
*F. Xavier Castellanos, M.D.*
- 932 **Hacia una mejor predicción de riesgo en individuos con alto riesgo de trastornos psicóticos**  
*Alison R. Yung, M.D., F.R.A.N.Z.C.P.*
- 934 **¿No es hora de utilizar la atención basada en la medición en la consulta?**  
*A. John Rush, M.D.*
- 937 **Más allá de la prueba de concepto para nuevos tratamientos**  
*Roy H. Perlis, M.D., M.Sc.*

### TRATAMIENTO EN PSIQUIATRÍA

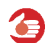

- 939 **Tratando el dolor psíquico de los pacientes**  
*Joel Yager, M.D.* **GUÍAS CLÍNICAS**

### COMENTARIO

- 944 **[Domestic Violence Awareness]**  
*Anna Chapman, M.D., Catherine Monk, Ph.D.* **GUÍAS CLÍNICAS**
- 946 **Psiquiatría reproductiva: La distancia entre la necesidad clínica y la educación**  
*Lauren M. Osborne, M.D., et al.* **GUÍAS CLÍNICAS**

### IMÁGENES EN PSIQUIATRÍA

- 949 **Las manchas de tinta de Rorschach invaden la cultura pop**  
*Michael A. Bushey, M.D., Ph.D.*

### RESÚMENES Y RESEÑAS

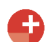

- 950 **La ketamina y otros antagonistas NMDA: Ensayos clínicos tempranos y posible mecanismo en la depresión**  
*D. Jeffrey Newport, M.D., M.S., M.Div., et al.* **AUDIO • GUÍAS CLÍNICAS**

## NUEVAS INVESTIGACIONES

### ARTÍCULOS

- 967 **¿Es el TDAH en adultos un trastorno del neurodesarrollo con inicio en la infancia? Evidencia de un estudio de cohorte de cuatro décadas.**  
*Terrie E. Moffitt, Ph.D., et al.* **EDITORIAL • CME • AUDIO • VIDEO • GUÍAS CLÍNICAS**
- 978 **Interacción entre los genes y el ambiente en la depresión en jóvenes: Réplica de la moderación del 5-HTTLPR en un ambiente diverso**  
*Thiago Botter-Maio Rocha, M.D., et al.* **AUDIO**
-  986 **Prevención de la psicosis: Una perspectiva clínica de alto riesgo desde el programa de reconocimiento y prevención (RAP, Recognition and Prevention)**  
*Barbara A. Cornblatt, Ph.D., M.B.A., et al.* **EDITORIAL • CME • AUDIO • GUÍAS CLÍNICAS**
- 995 **Anomalías estructurales del cerebro en un grupo de pacientes con esquizofrenia a largo plazo que nunca han sido medicados**  
*Wenjing Zhang, M.S., et al.* **VIDEO • GUÍAS CLÍNICAS**
-  1004 **Atención basada en la medición vs. atención estándar para la depresión mayor: Un ensayo controlado aleatorizado con evaluadores ciegos**  
*Tong Guo, M.D., et al.* **EDITORIAL • GUÍAS CLÍNICAS**
- 1014 **Un ensayo aleatorizado, doble ciego y controlado con placebo sobre la citicolina para la dependencia de la cocaína en trastorno bipolar I**  
*E. Sherwood Brown, M.D., Ph.D., et al.* **EDITORIAL • CME • AUDIO • GUÍAS CLÍNICAS**

**CARTAS AL EDITOR**

**1022 TCC breve y riesgo de suicidio: Descartando los efectos no específicos de la terapia individual**

*Brad W. Stankiewicz, M.D., et al.*

**1022 [Response to Stankiewicz et al.]**

*Craig J. Bryan, Psy.D., A.B.P.P., y M. David Rudd, Ph.D., A.B.P.P.*

**1023 Efectos cardíacos del metilfenidato**

*Steven Roose, M.D., y Bret Rutherford, M.D.*

**1023 [Response to Roose and Rutherford]**

*Helen Lavretsky, M.D., M.S.*

**1024 Un caso de un paciente deprimido con una reconstrucción craneal mayor e titanio, tratado con éxito con TEC**

*Hiroki Shiwaku, M.D., Ph.D., et al.*

**RESEÑA BIBLIOGRÁFICA**

**1026 Lighting Up: The Rise of Social Smoking on College Campuses [Prendiendo el cigarrillo: El aumento de fumadores sociales en los campus universitarios]**

*Jill M. Williams, M.D.*

**1027 Smoking Privileges: Psychiatry, the Mentally Ill, and the Tobacco Industry in America [Privilegios de fumar: La psiquiatría, los enfermos mentales y la industria del tabaco en Estados Unidos]**

*Judith J. Prochaska, Ph.D., M.P.H.*

**1028 The American Psychiatric Publishing Textbook of Substance Abuse Treatment, Fifth Edition [Manual psiquiátrico estadounidense sobre el tratamiento del abuso de sustancias, Quinta edición]**

*Christian Thurstone, M.D.*

**1029 The Behavioral Addictions [Las adicciones comportamentales]**

*Jon E. Grant, M.D., M.P.H.*

**1031 Books Received**

**1032 Correction**

**[APA OFFICIAL ACTIONS]**

**1033 Informes del Consejo de la APA**

**OTROS TEMAS DE INTERÉS**

**1047 Educación Médica Continuada**

**Cubierta:** [In the 1960s, the Rorschach inkblots were the most widely used personality test. The inkblots became a popular icon for mental health diagnosis in general. Michael Bushey recounts in this issue (p. 949) how Andy Warhol used the blots in his work. (Cover image: The tenth blot of the Rorschach inkblot test, by Hermann Rorschach [d. 1922] [public domain], via Wikimedia Commons.).]

Article content that addresses **Core Competencies**, defined by the Accreditation Council of Graduate Medical Education and the American Board of Medical Specialties, is indicated by the following symbols:

-  Professionalism
-  Patient Care and Procedural Skills
-  Medical Knowledge
-  Practice-Based Learning and Improvement
-  Interpersonal and Communication Skills
-  Systems-Based Practice.

More information is available at [www.abms.org/maintenance\\_of\\_certification/MOC\\_competencies.aspx](http://www.abms.org/maintenance_of_certification/MOC_competencies.aspx)

**La Tabla de Contenidos y resúmenes de Este Número Está Disponible en Español**

*(This issue's Table of Contents and abstracts are available in Spanish)*

Translation presented in collaboration with the Office of Global Health, Rutgers-Robert Wood Johnson Medical School

Support for this effort provided by ACTA Colombia.

**Translation courtesy of**

**Sergi Casals, M.A.**, Garuna, Medellín, Colombia ([www.garunaeditors.com](http://www.garunaeditors.com))

**Carlos Lopez Jaramillo, M.D.**, Universidad de Antioquia, Medellín, Colombia

**Javier I. Escobar, M.D., M.Sc.**, Rutgers-Robert Wood Johnson Medical School

**AUDIO** Highlighted in AJP Audio, a downloadable .mp3 file available at [ajp.psychiatryonline.org](http://ajp.psychiatryonline.org)

**CME** A course covering the content of this article is available online for paid subscribers to the AJP CME Course program

**EDITORIAL** Discussed in one of the issue's editorials

**GUÍAS CLÍNICAS** Clinical Guidance provided on the English table of contents

**VIDEO** Highlighted online by Deputy Editor Daniel S. Pine, M.D.

## La ketamina y otros antagonistas NMDA: Ensayos clínicos tempranos y posible mecanismo en la depresión

D. Jeffrey Newport, M.D., M.S., M.Div., Linda L. Carpenter, M.D., William M. McDonald, M.D., James B. Potash, M.D., M.P.H., Mauricio Tohen, M.D., Dr.P.H., M.B.A., Charles B. Nemeroff, M.D., Ph.D., The APA Council of Research Task Force on Novel Biomarkers and Treatments

**Objetivo:** Los autores hicieron una revisión sistemática y un meta-análisis de la ketamina y otros antagonistas de los receptores de N-metil-D-aspartato (NMDA) en el tratamiento de la depresión mayor.

**Método:** Se buscaron ensayos clínicos, aleatorizados, doble ciegos y controlados con placebo, de antagonistas NMDA en MEDLINE, psycINFO y otras bases de datos. Los resultados primarios fueron las tasas de respuesta al tratamiento y la remisión transitoria de síntomas. Los resultados secundarios incluyeron cambios en la severidad de los síntomas de la depresión y la frecuencia y severidad de los efectos disociativos y psicotomiméticos. Se combinaron los resultados de cada antagonista NMDA en meta-análisis, y se reportaron *odds ratios* para los resultados dicotómicos y diferencias estandarizadas de las medias para los resultados continuos.

**Resultados:** La ketamina (siete ensayos que incluyeron 147 pacientes tratados con ketamina) produjo un efecto antidepressivo rápido, aunque transitorio, con *odds ratio* para la respuesta y la remisión transitoria de síntomas a las 24 horas, de 9,87 (4,37–22,29) y 14,47 (2,67–78,49), respectivamente, acompañado de breves efectos psicotomiméticos y disocia-

tivos. La complementación de la TEC con ketamina (cinco ensayos que incluyeron 89 participantes tratados con ketamina) redujo de forma significativa los síntomas de depresión después de un tratamiento inicial (*g* de Hedge=0,933), pero no después de haber completado la TEC. Para los otros antagonistas NMDA no se pudo confirmar que fueran eficaces de manera consistente. Sin embargo, dos agonistas parciales en el sitio coagonista NMDA, la d-cicloserina y el rapastinel, redujeron de forma significativa los síntomas depresivos sin efectos psicotomiméticos ni disociativos.

**Conclusiones:** La eficacia antidepressiva de la ketamina, y quizás de la d-cicloserina y el rapastinel, es promisoria para futuras estrategias de modulación del glutamato. Sin embargo, la ineficacia de los otros antagonistas NMDA sugiere que los futuros avances dependerán de que tengamos un mejor entendimiento del mecanismo de acción de la ketamina. La naturaleza efímera del beneficio terapéutico de la ketamina, junto con el potencial que tiene para el abuso y la neurotoxicidad, sugieren que su uso en el contexto clínico exige precaución.

(*Am J Psychiatry* 2015; 172:950–966)

## ¿Es el TDAH en adultos un trastorno del neurodesarrollo con inicio en la infancia? Evidencia de un estudio de cohorte de cuatro décadas.

Terrie E. Moffitt, Ph.D., Renate Houts, Ph.D., Philip Asherson, M.D., Daniel W. Belsky, Ph.D., David L. Corcoran, Ph.D., Maggie Hammerle, B.A., HonaLee Harrington, B.A., Sean Hogan, M.S.W., Madeline H. Meier, Ph.D., Guilherme V. Polanczyk, M.D., Richie Poulton, Ph.D., Sandhya Ramrakha, Ph.D., Karen Sugden, Ph.D., Benjamin Williams, B.A., Luis Augusto Rohde, M.D., Avshalom Caspi, Ph.D.

**Objetivo:** A pesar de la dominante creencia que el TDAH en adultos es un trastorno del neurodesarrollo con su inicio en la infancia, ningún estudio longitudinal prospectivo ha descrito la niñez de la población adulta con TDAH. Los autores reportan análisis de seguimiento retrospectivo (*follow-back*) de casos de TDAH diagnosticados en la edad adulta, y análisis de seguimiento prospectivo (*follow-forward*) de casos de TDAH diagnosticados en la niñez, en una cohorte.

**Método:** Los participantes pertenecían a una cohorte de nacimiento representativa de 1.037 individuos nacidos en Dunedin, Nueva Zelanda, en 1972 y 1973, y se les hizo seguimiento hasta los 38 años, con una retención del 95%. Se evaluaron los síntomas de TDAH, las características clínicas asociadas, los trastornos comórbidos, los déficits neuropsicológicos, el riesgo poligénico derivado de estudio de asociación del genoma completo, y los indicadores de incapacidad. Las fuentes de los datos fueron los participantes, padres, profesores, informantes, los resultados de pruebas neuropsicológicas y los registros administrativos. Para los diagnósticos de TDAH en adultos se utilizaron los criterios del DSM-5, además de la edad de inicio y la corroboración transversal, que fueron medidas de los resultados del estudio.

**Resultados:** Tal como se esperaba, el TDAH en la infancia tuvo una prevalencia del 6% (predominantemente en va-

rones) y se asoció con trastornos comórbidos en la infancia, déficits neurocognitivos, riesgo poligénico y discapacidad residual en la vida adulta. Como también cabía esperar, el TDAH en la edad adulta tuvo una prevalencia del 3% (con igual proporción en hombres y mujeres) y se relacionó con la dependencia de sustancias en la edad adulta, el deterioro en la vida adulta, y el contacto con el tratamiento. Inesperadamente, los grupos de TDAH infantil y TDAH adulto prácticamente no contenían conjuntos que se solaparan, 90% de los casos de TDAH adulto no tenían historia de TDAH infantil. De modo igualmente inesperado, el grupo de TDAH en adultos no mostró déficits neuropsicológicos comprobados en la infancia ni en la edad adulta, ni riesgo poligénico de TDAH en la infancia.

**Conclusiones:** Los resultados plantean la posibilidad de que los adultos que presentan el cuadro sintomático de TDAH pueden no haber tenido ningún trastorno del neurodesarrollo con inicio en la infancia. Si este hallazgo se replica, deberá reconsiderarse el lugar del trastorno en el sistema de clasificación y será necesario investigar la etiología del TDAH adulto.

(*Am J Psychiatry* 2015; 172:967–977)

# Interacción entre los genes y el ambiente en la depresión en jóvenes: Réplica de la moderación del 5-HTTLPR en un ambiente diverso

Thiago Botter-Maio Rocha, M.D., Mara H. Hutz, Ph.D., Angélica Salatino-Oliveira, B.S., Júlia P. Genro, Ph.D., Guilherme V. Polanczyk, M.D., Ph.D., João Ricardo Sato, Ph.D., Fernando C. Wehrmeister, Ph.D., Fernando C. Barros, M.D., Ph.D., Ana M.B. Menezes, M.D., Ph.D., Luis Augusto Rohde, M.D., Ph.D., Luciana Anselmi, Ph.D., Christian Kieling, M.D., Ph.D.

**Objetivo:** La réplica de hallazgos científicos es un reto importante en la investigación biomédica. En psiquiatría, la identificación de interacciones entre genes y ambiente (G3E) ha promovido un debate acalorado en la última década, con resultados polémicos acerca de la influencia de dicha interacción en trastornos como la depresión mayor. Los autores se propusieron replicar un estudio de 2003 sobre G3E en la depresión en jóvenes, en una cohorte de nacimiento grande de un entorno diverso.

**Método:** Utilizando datos del Estudio de Pelotas de Cohorte de Nacimiento en 1993 y adoptando un diseño tan parecido como fue posible al del estudio original, los autores evaluaron si la relación entre el maltrato en la infancia y un subsecuente diagnóstico de episodio depresivo estaba moderada por el genotipo 5-HTTLPR. De 5.249 individuos evaluados al nacer y a quienes se les hizo seguimiento hasta los 18 años, se tuvo acceso a datos sobre la evaluación de episodios depresivos en la edad adulta temprana, sobre el maltrato infantil y sobre el genotipo de 3.558 participantes, de los cuales 2.392 siguieron en el estudio después de la evaluación conservadora de síntomas depresivos previos. Se

investigaron las asociaciones con análisis de regresión logística y se controlaron las potenciales variables de confusión.

**Resultados:** Los resultados replicaron hallazgos importantes del estudio original, esta vez en una muestra de adultos jóvenes de un país de ingresos medianos: hubo una relación diferencial de la respuesta a la dosis entre el maltrato en la infancia y la depresión mayor de acuerdo con el genotipo 5-HTTLPR.

**Conclusiones:** Después de seguir una estrategia de investigación tan similar como fue posible a la del estudio original, los resultados corroboraron la existencia de una G3E medida, en esta ocasión en una muestra grande de un contexto sociocultural distinto. Estos hallazgos brindan más evidencia de que una variante genética en el 5-HTTLPR modera la relación entre el maltrato en la infancia y la depresión en la juventud.

(*Am J Psychiatry* 2015; 172:978–985)

## Prevención de la psicosis: Una perspectiva clínica de alto riesgo desde el programa de reconocimiento y prevención (RAP, Recognition and Prevention)

Barbara A. Cornblatt, Ph.D., M.B.A., Ricardo E. Carrión, Ph.D., Andrea Auther, Ph.D., Danielle McLaughlin, M.A., Ruth H. Olsen, B.S., Majnu John, Ph.D., Christoph U. Correll, M.D.

**Objetivo:** La intervención y prevención tempranas de la psicosis siguen siendo un reto importante. Se avanzaría mucho en predicción si se pudiera identificar a las personas que tienen un riesgo real, cosa que por el momento se logra sólo hasta cierto punto. Los autores probaron una estrategia modificada para mejorar la predicción y seleccionaron una muestra más homogénea de individuos con riesgo alto (solamente síntomas positivos atenuados, rango de edad desde los 15 años hasta el inicio de la década de los 20)

**Método:** Se hizo seguimiento de una muestra de 101 adolescentes con riesgo clínico alto de psicosis que buscaban tratamiento (edad media, 15,9 años) durante 5 años (tiempo de seguimiento medio: 3,0 años; DE=1,6). Se incluyó a los adolescentes sólo si mostraban uno o más síntomas positivos atenuados, con un nivel de severidad entre moderado y severo, pero no psicótico. Se utilizó la regresión de Cox para derivar un índice de riesgo.

**Resultados:** La tasa general de conversión a psicosis fue 28,3%. El modelo predictor final, con una validez predictiva

positiva de 81,8%, consistió en 4 variables: comunicación desorganizada, desconfianza, déficits de memoria verbal y deterioro del funcionamiento social durante el seguimiento. Los efectos significativos también sugirieron que la edad de riesgo se podía limitar a 15-22 años.

**Conclusiones:** Los criterios clínicos para algo de riesgo que enfatizan la comunicación desorganizada y la desconfianza y que a su vez incluyen la memoria verbal comprometida y el funcionamiento social en deterioro, tienen el potencial de mejorar la precisión predictiva, en comparación con el uso únicamente de síntomas positivos atenuados. En el índice de riesgo resultante (una combinación ponderada de los predictores), se interpretó que los puntajes bajos implicaban bajo riesgo, con necesidad de poco tratamiento, que los puntajes altos sugerían una intervención agresiva y que los puntajes intermedios, aunque fueran menos informativos, apoyaban el tratamiento psicosocial.

*(Am J Psychiatry 2015; 172:986–994)*

## Anomalías estructurales del cerebro en un grupo de pacientes con esquizofrenia a largo plazo que nunca han sido medicados

Wenjing Zhang, M.S., Wei Deng, M.D., Li Yao, M.D., Yuan Xiao, M.S., Fei Li, M.D., Jieke Liu, M.D., John A. Sweeney, Ph.D., Su Lui, M.D., Ph.D., Qiyong Gong, M.D., Ph.D.

**Objetivo:** Este estudio investigó la morfometría cerebral en pacientes con esquizofrenia que eran enfermos crónicos y que nunca habían sido medicados, y si la relación de la edad con las anomalías morfométricas difería entre estos pacientes y los sujetos sanos.

**Método:** En un diseño transversal, se obtuvieron imágenes de alta resolución ponderadas en T1 de 25 pacientes esquizofrénicos, con enfermedad crónica sin tratar con una duración de entre 5 y 47 años, y 33 sujetos sanos de comparación. Se compararon el grosor cortical y la sustancia gris en los dos grupos. En las regiones donde hubo diferencias significativas entre los dos grupos, se utilizó el modelado no lineal de efectos relacionados con la edad para evaluar el deterioro acelerado en los pacientes.

**Resultados:** Los pacientes con esquizofrenia tuvieron menor grosor cortical en las cortezas ventromediales bilaterales, el giro temporal superior izquierdo y el pars triangularis derecho, en relación a los sujetos de comparación, y mayor grosor cortical en el lóbulo parietal superior izquierdo. La relación de la edad con el grosor cortical indicó un adel-

gazamiento cortical más rápido relacionado con la edad en la corteza prefrontal ventromedial derecha, el giro temporal superior izquierdo y el pars triangularis derecho en los pacientes, en comparación con los sujetos de comparación, pero un adelgazamiento más lento en el lóbulo parietal superior izquierdo. El volumen de sustancia gris fue mayor en el putamen bilateralmente y menor en el giro temporal medio derecho y el giro lingual derecho de los pacientes, pero los efectos relacionados con la edad no difirieron de los observados en los sujetos de comparación.

**Conclusiones:** El deterioro relacionado con la edad acelerado en el grosor cortical temporal y prefrontal en pacientes con esquizofrenia que nunca han sido medicados sugiere un proceso neuroprogresivo en algunas regiones cerebrales. El adelgazamiento cortical relacionado con la edad más lento de la corteza parietal superior y las anomalías volumétricas estriatales que no están relacionadas con la edad sugieren diferentes procesos patológicos a lo largo del tiempo en estas regiones.

(*Am J Psychiatry* 2015; 172:995–1003)

## Atención basada en la medición vs. atención estándar para la depresión mayor: Un ensayo controlado aleatorizado con evaluadores ciegos

Tong Guo, M.D., Yu-Tao Xiang, M.D., Ph.D., Le Xiao, M.D., Chang-Qing Hu, M.D., Helen F.K. Chiu, F.R.C.Psych., Gabor S. Ungvari, M.D., Ph.D., Christoph U. Correll, M.D., Kelly Y.C. Lai, M.R.C.Psych., Lei Feng, M.D., Ph.D., Ying Geng, M.D., M.Phil., Yuan Feng, M.D., Gang Wang, M.D., Ph.D.

**Objetivo:** Los autores compararon la atención basada en la medición con el tratamiento estándar en la depresión mayor.

**Método:** Pacientes externos con depresión entre moderada y severa fueron asignados aleatoriamente para recibir durante 24 semanas, o bien atención basada en la medición (decisiones basadas en guías y escalas de evaluación, N= 61) o bien atención estándar (decisiones a discreción de los clínicos, N=59). La farmacoterapia se restringió a la paroxetina (20–60mg/día) o la mirtazapina (15–45mg/día) en ambos grupos. Los síntomas depresivos se midieron con la Escala de Evaluación de Depresión de Hamilton (HAM-D) y el Inventario Rápido de Sintomatología Depresiva–Auto-Reportada (QIDS-SR). El tiempo para la respuesta (una disminución de por lo menos el 50% en el puntaje de la escala HAM-D) y la remisión (un puntaje en la escala HAM-D de 7 o inferior) fueron las variables de evaluación primaria. La evaluación de los resultados la hicieron evaluadores ciegos al protocolo del estudio y al tratamiento.

**Resultados:** El número de pacientes que respondieron fue significativamente más alto en el grupo de atención basada en la medición que el grupo de tratamiento estándar (86,9% comparado con 62,7%), igual que el número de pacientes

que remitieron (73,8% comparado con 28,8%). De modo similar, el tiempo hasta la respuesta y la remisión fue significativamente inferior con la atención basada en la medición (para respuesta, 5,6 semanas comparado con 11,6 semanas, y para remisión, 10,2 semanas comparado con 19,2 semanas). Los puntajes de la escala HAM-D disminuyeron significativamente en ambos grupos, pero la reducción fue significativamente mayor para el grupo de atención basada en la medición (217,8 comparado con 213,6). El grupo de atención basada en la medición tuvo una cantidad significativamente mayor de ajustes del tratamiento (44 comparado con 23) y dosis de antidepresivos más altas desde la semana 2 hasta la semana 24. Las tasas de abandono del estudio, los efectos adversos y las medicaciones concomitantes no difieren entre los dos grupos.

**Conclusiones:** Los resultados demuestran la factibilidad y efectividad de la atención basada en la medición para pacientes externos con depresión entre moderada y severa y sugieren que este enfoque puede ser incorporado en la atención clínica de pacientes con depresión mayor.

(*Am J Psychiatry* 2015; 172:1004–1013)



# Un ensayo aleatorizado, doble ciego y controlado con placebo sobre la citicolina para la dependencia de la cocaína en trastorno bipolar I

E. Sherwood Brown, M.D., Ph.D., Jackie Peterson Todd, M.S., Lisa T. Hu, P.A., Joy M. Schmitz, Ph.D., Thomas J. Carmody, Ph.D., Alyson Nakamura, M.D., Prabha Sunderajan, M.D., A. John Rush, M.D., Bryon Adinoff, M.D., Mary Ellen Bret, M.D., Traci Holmes, B.S., Alexander Lo, M.P.H.

**Objetivo:** Aunque la dependencia de las drogas es común en pacientes con trastorno bipolar, existen muy pocos datos sobre el tratamiento de la dependencia de las drogas en esta población de pacientes. Los autores anteriormente habían reportado un riesgo disminuido de recaída en el uso de la cocaína en un estudio piloto de citicolina en pacientes con trastorno bipolar y dependencia de la cocaína. El objetivo primario del estudio actual fue determinar si la citicolina reduce el uso de cocaína en los pacientes con trastorno bipolar I que actualmente son dependientes de la cocaína y la consumen activamente.

**Método:** Un total de 130 pacientes externos con trastorno bipolar I (estado depresivo o mixto) y dependencia de la cocaína recibieron un tratamiento adyuvante con citicolina o placebo durante 12 semanas. Los resultados de exámenes de orina tres veces por semana se analizaron utilizando un modelo lineal mixto que se ajustó al resultado binario de las pruebas de cocaína positivas cada vez que se hacían los exámenes durante 12 semanas. El estado de ánimo se evaluó con el Inventario de Sintomatología Depresiva–Auto-Re-

portada, la Escala de Depresión de Hamilton y la Escala de Manías de Young.

**Resultados:** En la muestra con intención de tratar (N=61 en ambos grupos), se observaron efectos significativos por grupo del tratamiento y en ambos grupos se vieron efectos con el tiempo, tanto si se consideraba que los exámenes de orina eran positivos como si no. El efecto de grupo fue mayor al inicio del estudio y tendió a disminuir con el tiempo. No se observaron diferencias entre los grupos en los síntomas del estado del ánimo o los efectos secundarios.

**Conclusiones:** La citicolina fue bien tolerada para el tratamiento de la dependencia de la cocaína en pacientes con trastorno bipolar. El consumo de cocaína se redujo de forma significativa con la citicolina inicialmente, aunque los efectos del tratamiento disminuyeron con el tiempo, sugiriendo la necesidad de estrategias de aumento para optimizar el beneficio a largo plazo.

(*Am J Psychiatry* 2015; 172:1014–1021)
