OCTOBER 2015 | VOLUME 172 | NUMBER 10

# The American Journal of Psychiatry

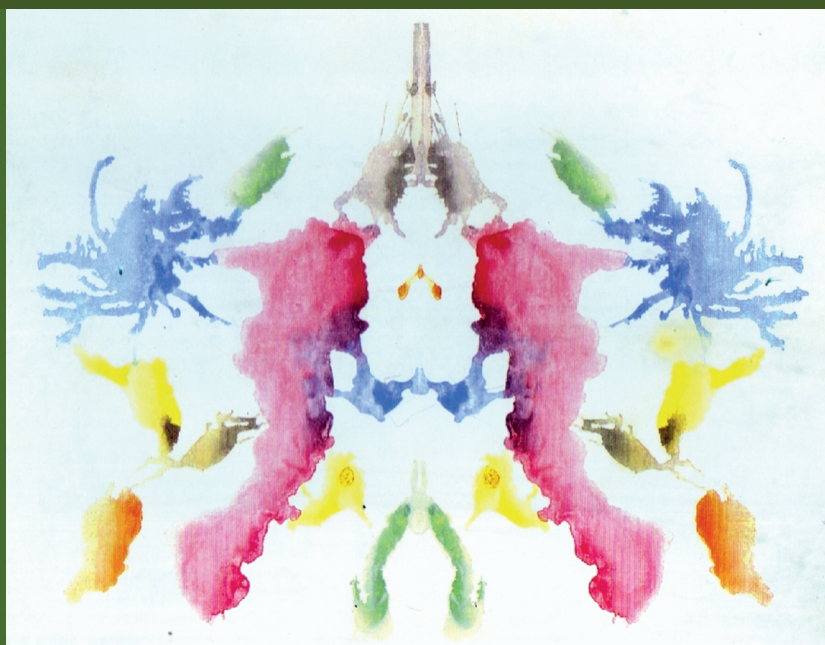

Rorschach Inkblot Invasion of Pop Culture

Domestic Violence Awareness

Reproductive Psychiatry: The Gap Between  
Clinical Need and Education

Ketamine and Other NMDA Antagonists:  
Early Clinical Trials and Possible Mechanisms in Depression

AMERICAN  
PSYCHIATRIC  
ASSOCIATION

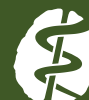

[ajp.psychiatryonline.org](http://ajp.psychiatryonline.org)
