# The American Journal of Psychiatry

Official Journal of the American Psychiatric Association

## Officers 2015–2016

### President

Renée L. Binder, M.D.

### President-Elect

Maria A. Oquendo, M.D.

### Treasurer

Frank W. Brown, M.D.

### Secretary

Altha J. Stewart, M.D.

### Assembly

#### Speaker

Glenn A. Martin, M.D.

#### Speaker-Elect

Daniel J. Anzia, M.D.

#### Recorder

Theresa Miskimen, M.D.

### Office of the CEO and Medical Director

#### CEO and Medical Director

Saul Levin, M.D., M.P.A.

### Board of Trustees

Jeffrey Akaka, M.D.

Lama Bazzi, M.D.

R. Scott Benson, M.D.

Ronald M. Burd, M.D.

Stella Cai, M.D.

Brian Crowley, M.D.

Anita S. Everett, M.D.

Jeffrey L. Geller, M.D., M.P.H.

Dilip V. Jeste, M.D.

Jeffrey A. Lieberman, M.D.

Vivian B. Pender, M.D.

Gail E. Robinson, M.D.

Ravi N. Shah, M.D.

Paul Summergrad, M.D.

Melinda Young, M.D.

## Editorial Board

### Editor

Robert Freedman, M.D.

### Deputy Editors

David A. Lewis, M.D.

Robert Michels, M.D.

Daniel S. Pine, M.D.

A. John Rush, M.D.

Susan K. Schultz, M.D.

Carol A. Tamminga, M.D.

### Associate Editors

Alan Brown, M.D., M.P.H.

Tyrone Cannon, Ph.D.

Benjamin G. Druss, M.D., M.P.H.

Graham J. Emslie, M.D.

Daniel C. Javitt, M.D.

Bankole Johnson, M.D.

Ellen Leibenluft, M.D.

Joan L. Luby, M.D.

Constantine G. Lyketsos, M.D., M.H.S.

Helen S. Mayberg, M.D., F.R.C.P.C.

Barbara Milrod, M.D.

Terrie E. Moffitt, Ph.D.

Anita Thapar, M.B.B.Ch., F.R.C.Psych.,

Ph.D., F.Med.Sci.

Mauricio Tohen, M.D., Dr.PH., M.B.A.

Eduard Vieta, M.D., Ph.D.

Katherine L. Wisner, M.D., M.S.

Xin Yu, M.D.

### Editor Emerita

Nancy C. Andreasen, M.D., Ph.D.

### Former Editors

Amariah Brigham, M.D., 1844–1849

T. Romeyn Beck, M.D., 1849–1854

John P. Gray, M.D., 1854–1886

G. Alder Blumer, M.D., 1886–1894

Richard Dewey, M.D., 1894–1897

Henry M. Hurd, M.D., 1897–1904

Edward N. Brush, M.D., 1904–1931

Clarence B. Farrar, M.D., 1931–1965

Francis J. Braceland, M.D., 1965–1978

John C. Nemiah, M.D., 1978–1993

### Editorial Staff

#### Executive Editor

Michael D. Roy

#### Senior Editors

John J. Guardiano, Ph.D.

Jane Weaver

#### Production Manager

Susan Westrate

#### Assistant Editor

Angela Moore

#### Online Content Manager

Michael Pogachar

#### Editorial Support Services Manager

Heidi Koch

#### Editorial Assistant

Linda LaCour

#### Editorial Assistant/ Permissions Coordinator

Elizabeth Stern

#### Assistants to the Editors

Lois Lilienthal

Laura English

Rachel Hogg

Russell A. Scholl

### Publisher

Rebecca D. Rinehart

# The Residents' JOURNAL

## The American Journal of Psychiatry Residents' Journal

September 2015

Volume 10

Issue 9

### Inside

- 2 **Pediatric Neuropsychiatry: A Conceptual Framework**  
Aaron J. Hauptman, M.D.
- 3 **Advances in Differentiating Pediatric Bipolar Disorder From Attention Deficit Hyperactivity Disorder**  
Ross E. Goodwin, M.D.
- 6 **The Challenge of Diagnosing and Managing Attention Deficit Hyperactivity Disorder in the Traumatized Child**  
Muhammad Puri, M.D., M.P.H.
- 9 **Pediatric Anti-NMDA Receptor Encephalitis**  
Vanita Sahasranaman, M.D.
- 12 **A Patient With Guillain-Barré Syndrome Masquerading as Conversion Disorder**  
Taranjeet Singh Jolly, M.D.
- 15 **Delineating PANDAS/PANS Diagnosis**  
Jennifer Severe, M.D.
- 18 **Clinical Topics in Child and Adolescent Psychiatry**  
Reviewed by Venkata B. Kolli, M.B.B.S., M.R.C.Psych.
- 19 **Residents' Resources**

### IN THIS ISSUE



This month's issue features articles on the topic of **Pediatric Neuropsychiatry**. In an editorial, Aaron J. Hauptman, M.D., discusses the relevance of utilizing the neuropsychiatric approach in the complex care of children. Ross E. Goodwin, M.D., examines diagnostic differences between pediatric bipolar disorder and attention deficit hyperactivity disorder (ADHD), emphasizing the deleterious effects of misdiagnosis. Muhammad Puri, M.D., M.P.H., analyzes the challenge of diagnosing ADHD in traumatized children. Vanita Sahasranaman, M.D., examines pediatric anti-N-methyl-D-aspartate encephalitis, including discussion on clinical presentation, pathophysiology, and treatment. Taranjeet Singh Jolly, M.D., investigates a case of Guillain-Barré syndrome masquerading as conversion disorder in an 8-year-old female patient. Jennifer Severe, M.D., provides discussion on delineating pediatric autoimmune neuropsychiatric disorders associated with streptococcal infections and pediatric acute-onset neuropsychiatric syndrome in the case of an 8-year-old patient. Lastly, Venkata B. Kolli, M.B.B.S., M.R.C.Psych., presents a review of *Clinical Topics in Child and Adolescent Psychiatry*.

**Editor-in-Chief**  
Rajiv Radhakrishnan, M.B.B.S., M.D.

**Senior Deputy Editor**  
Katherine Pier, M.D.

**Deputy Editor**  
Hun Millard, M.D., M.A.

**Guest Section Editor**  
Aaron J. Hauptman, M.D.

**Associate Editors**  
Rafik Sidaros, M.B.B.Ch.  
Janet Charoensook, M.D.

**Staff Editor**  
Angela Moore

**Editors Emeriti**  
Sarah B. Johnson, M.D.  
Molly McVoy, M.D.  
Joseph M. Cerimele, M.D.  
Sarah M. Fayad, M.D.  
Monifa Seawell, M.D.  
Misty Richards, M.D., M.S.

### Editor-in-Chief

Rajiv Radhakrishnan, M.B.B.S., M.D.

### Senior Deputy Editor

Katherine Pier, M.D.

### Deputy Editor

Hun Millard, M.D., M.A.

### Associate Editors

Rafik Sidaros, M.B.B.Ch.

Janet Charoensook, M.D.

*The Residents' Journal* accepts manuscripts authored by medical students, resident physicians, and fellows. To submit your paper, please visit the manuscript submission site at [mc.manuscriptcentral.com/appi-ajp](http://mc.manuscriptcentral.com/appi-ajp) and either create an account or use your existing account. For manuscript type, select "Residents." Then follow the instructions to upload your manuscript. Residents who are interested in participating as Guest Section Editors should e-mail *The Residents' Journal* Editor-in-Chief Rajiv Radhakrishnan at [rajiv.radhakrishnan@yale.edu](mailto:rajiv.radhakrishnan@yale.edu).

*The Residents' Journal* is sent free-of-charge to all psychiatry residents. Anyone interested in being included on the distribution list should contact Angela Moore, *The Residents' Journal* staff editor at [ajp@psych.org](mailto:ajp@psych.org) with "Subscribe to Residents' Journal" in the subject line.

To access the complete Residents' Journal archives, visit [ajp.psychiatryonline.org/residents\\_journal](http://ajp.psychiatryonline.org/residents_journal)

# THE AMERICAN PSYCHIATRIC ASSOCIATION

1000 Wilson Blvd., Suite 1825, Arlington, VA 22209-3901  
(888) 357-7924 (toll-free inside the U.S. and Canada) / (703) 907-7300  
web site: [www.psychiatry.org](http://www.psychiatry.org) • e-mail: [apa@psych.org](mailto:apa@psych.org)

## Chairpersons of Councils, Committees, and Task Forces

### Standing Committees

|                             |                                |
|-----------------------------|--------------------------------|
| <b>Bylaws</b>               | Rebecca W. Brendel, M.D., J.D. |
| <b>Elections</b>            | Barry K. Herman, M.D.          |
| <b>Ethics</b>               | Ezra Griffith, M.D.            |
| <b>Finance and Budget</b>   | Alan F. Schatzberg, M.D.       |
| <i>Audit</i>                | Frank W. Brown, M.D.           |
| <i>Investment Oversight</i> | David Fassler, M.D.            |
| <b>Joint Reference</b>      | Maria A. Oquendo, M.D.         |
| <b>Membership</b>           | Rahn K. Bailey, M.D.           |
| <b>Nominating</b>           | Paul Summergrad, M.D.          |
| <b>Tellers</b>              | Catherine May, M.D.            |

### Councils

#### **Council on Addiction Psychiatry**

Frances R. Levin, M.D.

#### **Council on Advocacy and Government Relations**

Barry B. Perlman, M.D.

*Advocacy and Litigation Funding*

Jeffrey Akaka, M.D.

*Caucus of State Hospital Psychiatrists*

*Caucus of VA Psychiatrists*

#### **Council on Children, Adolescents, and Their Families**

Joseph V. Penn, M.D.

*Agnes Purcell McGavin Award*

Robert Lee Hendren, M.D.

*Blanche F. Ittleson Research Award*

Michael Houston, M.D.

*Caucus of Psychiatrists Treating Persons With Intellectual Disabilities*

*College Mental Health Caucus*

#### **Council on Communications**

Arshya Vahabzadeh, M.D.

#### **Council on Geriatric Psychiatry**

Robert P. Roca, M.D.

#### **Council on Healthcare Systems and Financing**

Harsh K. Trivedi, M.D.

*Reimbursement for Psychiatric Care*

Bruce J. Schwartz, M.D.

*RBRVS, Codes and Reimbursement*

Gregory G. Harris, M.D.

#### **Council on International Psychiatry**

Michelle Riba, M.D.

*Caucus on Global Mental Health and Psychiatry*

#### **Council on Medical Education and Lifelong Learning**

Richard F. Summers, M.D.

*American Leadership Fellowship Selection*

Leah J. Dickstein, M.D., M.A.

*APA Public Psychiatry Fellowship Selection Committee*  
Derri Shtasel, M.D.

*APA/SAMHSA Minority Fellowship Selection and Advisory*  
Roberto Lewis-Fernandez, M.D.

*Caucus on MOC Issues*

*Caucus of Resident-Fellow Members*

*Scientific Program*

Steven Koh, M.D.

*Scientific Program Committee of the Institute on Psychiatric Services*

Mary E. Diamond, M.D.

*Subcommittee on Joint Sponsorship of Continuing Medical Education (CME)*

*Vestermark Award Committee*

Jonathan F. Borus, M.D.

#### **Council on Minority Mental Health and Health Disparities**

Christina V. Mangurian, M.D.

*Caucus of Rural Psychiatrists*

*Caucus on Religion, Spirituality and Psychiatry*

#### **Council on Psychiatry And Law**

Steven K. Hoge, M.D.

*Caucus of Correctional Psychiatrists*

*Isaac Ray/Human Rights Award*

Liza Hannah Gold, M.D.

*Judicial Action*

Marvin Stanley, M.D.

*Manfred S. Guttmacher Award*

David A. Lowenthal, M.D.

#### **Council on Psychosomatic Medicine (Consultation Liaison Psychiatry)**

David F. Gitlin, M.D.

#### **Council on Quality Care**

Grayson Norquist, M.D.

*Mental Health Information Technology*

Steven Roy Daviss, M.D.

*Performance Measures*

Karen Pierce, M.D.

*Steering Committee on Practice Guidelines*

Michael J. Vergare, M.D.

#### **Council on Research**

Dwight L. Evans, M.D.

*Caucus of Psychiatrists Treating Persons with Eating Disorders*

*Caucus on Complementary and Alternative Medicine*

*Psychiatric Dimensions of Disasters*

Robert J. Ursano, M.D.

*Research Awards*

Matthew W. State, M.D.

*Task Force on DSM-5*

*Task Force to Revise the Practice of Electroconvulsive Therapy*

# There's So Much More to AJP Than Meets the Page!

Visit *The American Journal of Psychiatry's* website on PsychiatryOnline for the following features!



## AJP in Advance

The very latest research advances!

At **AJP in Advance**, you can discover the following before their appearance in print:

### **Smoking and Schizophrenia in Population Cohorts of Swedish Women and Men: A Prospective Co-Relative Control Study**

Smoking predicted increased risk for later schizophrenia in female and male population cohorts. In monozygotic twins discordant for smoking, the smoking twin had a higher risk for nonaffective psychosis.

### **Molecular Mechanisms and Timing of Cortical Immune Activation in Schizophrenia**

Immune activation in the prefrontal cortex in schizophrenia is indicated by high mRNA levels for IFITM, a viral restriction factor. Levels were also high for cytokines that induce IFITM expression and for a critical transcription factor; levels were low for a transcriptional inhibitor. Similar levels were found in adult mice given an immune stimulant, but not those with prenatal exposure to maternal stimulation.



## AJP CME

Three articles in this issue form the basis of a short course with questions that can be answered for up to 1 *AMA PRA Category 1 Credit™* each by visiting <http://psychiatryonline.org/cme> and clicking on the "American Journal of Psychiatry" tab. CME credit is issued only **online**, and a paid subscription to AJP CME course program is required. This month's courses appear on pages 1047–1050.



Audio and Video

## Have You Heard?

With AJP Audio you can listen to highlights of this issue. This month, Executive Editor Michael Roy discusses ketamine and other NMDA antagonists as treatments for depression, a gene-environment interaction affecting depression risk, a longitudinal study of ADHD in children and adults, a follow-up of adolescents at clinical high risk of psychosis, and a clinical trial of citicoline for cocaine dependence in bipolar I disorder.

Also, visit the online edition of this month's Journal to view a video of Deputy Editor Daniel S. Pine, M.D., presenting highlights from the issue.



## Revisit the field's rich history!

### **150 years ago this month: "Tests of Insanity"**

Dr. John E. Tyler discusses the thorny issue of defining serious mental illness—beyond simply knowing it when one sees it: "Practically," he says, "there is not often any great difficulty in recognizing a case of mental disorder; but often there is a difficulty in describing it to others, and this is because most of the common marks of insanity are comparative and not absolute."

### **100 years ago this month: "The Therapeutic and Economic Value of Diversional Occupation"**

Dr. Britton D. Evans and Dr. Frank M. Mikels describe various forms of "diversional occupation" and the benefits they may offer to both patient and institution. "Any form of work which diverts the attention of the patient from his morbid ideas and false sensory perceptions may be regarded as a diversional occupation."
